# Supplementary material for: Orientation loss of microcrystals of DyBa2Cu3Oyin a polymer composite during curing of the medium under an external magnetic field
Source: Royal Society of Chemistry journal article supplement (doi:10.1039/d0ce00795a), 2020-01-01
Supplement: d0ce00795a1.pdf [file d0ce00795a1.pdf]

**Supplementary information for**

**Orientation loss of microcrystals of DyBa<sub>2</sub>Cu<sub>3</sub>O<sub>y</sub> in polymer composite during curing of  
the medium under an external magnetic field**

Tsunehisa Kimura,<sup>a,b,\*</sup> Hayato Kashiwagi,<sup>c</sup> Fumiko Kimura,<sup>d</sup> Shigeru Horii,<sup>d</sup> Kazuki Takeda,<sup>e</sup>  
and Toshiya Doi<sup>c</sup>

<sup>a</sup>Fukui University of Technology, 3-6-1 Gakuen, Fukui 910-8505, Japan

<sup>b</sup>Kyoto University, Sakyo-ku, Kyoto 606-8502, Japan

<sup>c</sup>Graduate School of Energy Science, Kyoto University, Yoshida-Honmachi, Sakyo-ku, Kyoto  
606-8501, Japan

<sup>d</sup>Nagamori Institute of Actuators, Kyoto University of Advanced Science, Yamanouchi-  
Gotandacho, Ukyo-ku, Kyoto 615-8577, Japan

<sup>e</sup>Division of Chemistry, Graduate School of Science, Kyoto University, Kyoto 606-8502, Japan

\* Email: [tkimura@kais.kyoto-u.ac.jp](mailto:tkimura@kais.kyoto-u.ac.jp), [tkimura@fukui-ut.ac.jp](mailto:tkimura@fukui-ut.ac.jp)

This PDF file includes:

Supplementary Note

Fig. S1 to S3

### Supplementary Note

Because the data points are scattered, fittings are carried out for the data set in which some scattered data points are omitted. The results of fitting are indicated by solid curves. The parameters used are summarized in Table 1.

### Supplementary Figures

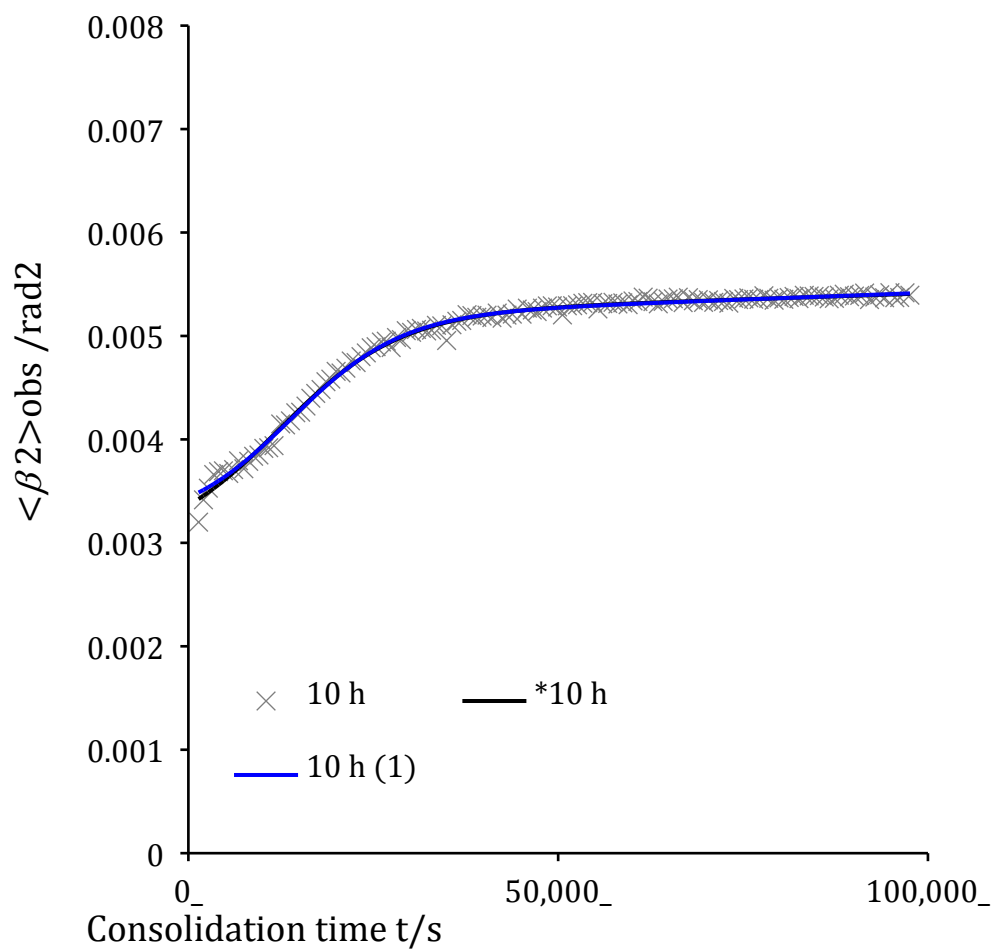

Fig. S1 Fitting results for a 10 h sample where all data points are used (\*10 h) and some scattered data points are omitted (10 h (1)). Omitted points are not shown.

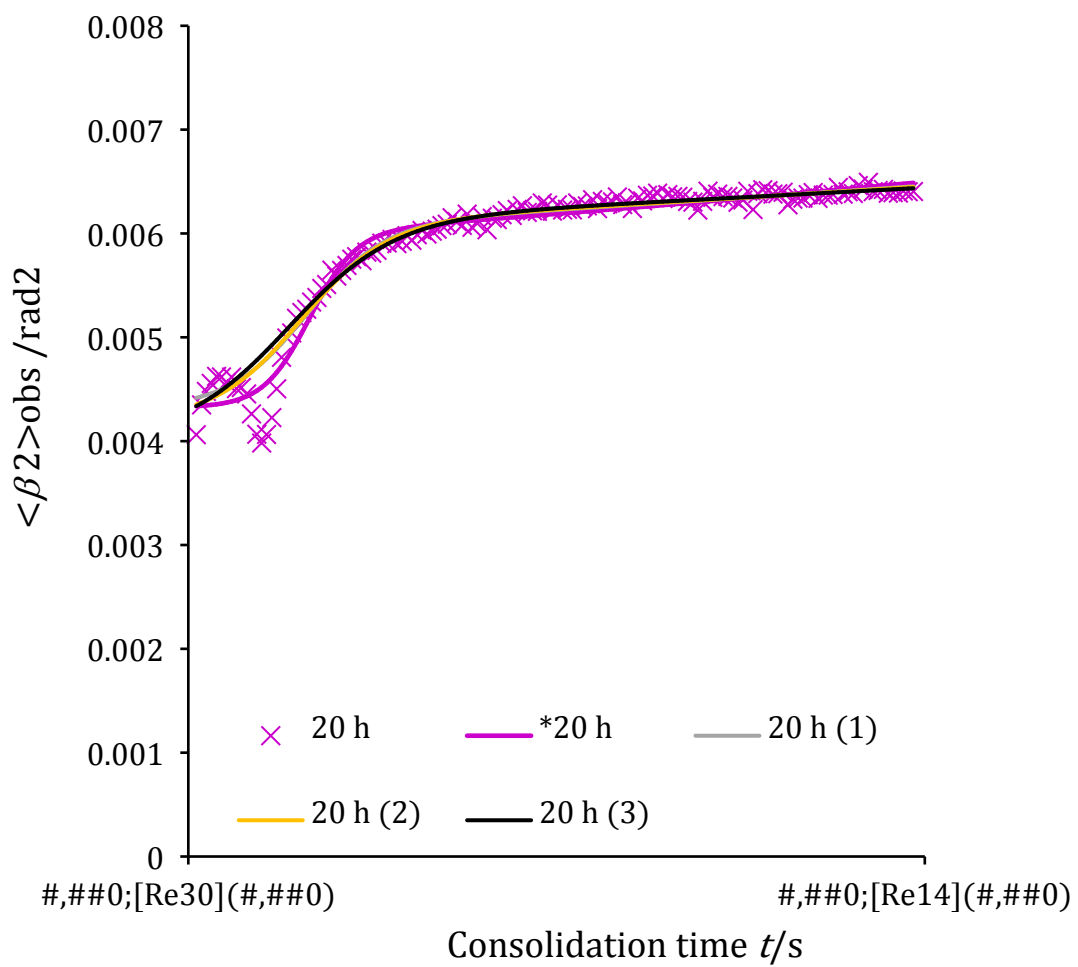

Fig. S2 Fitting results for a 20 h sample where all data points are used (\*20 h) and some scattered data points are omitted (20 h (1), 20 h (2), 20 h (3)). Omitted points are not shown.

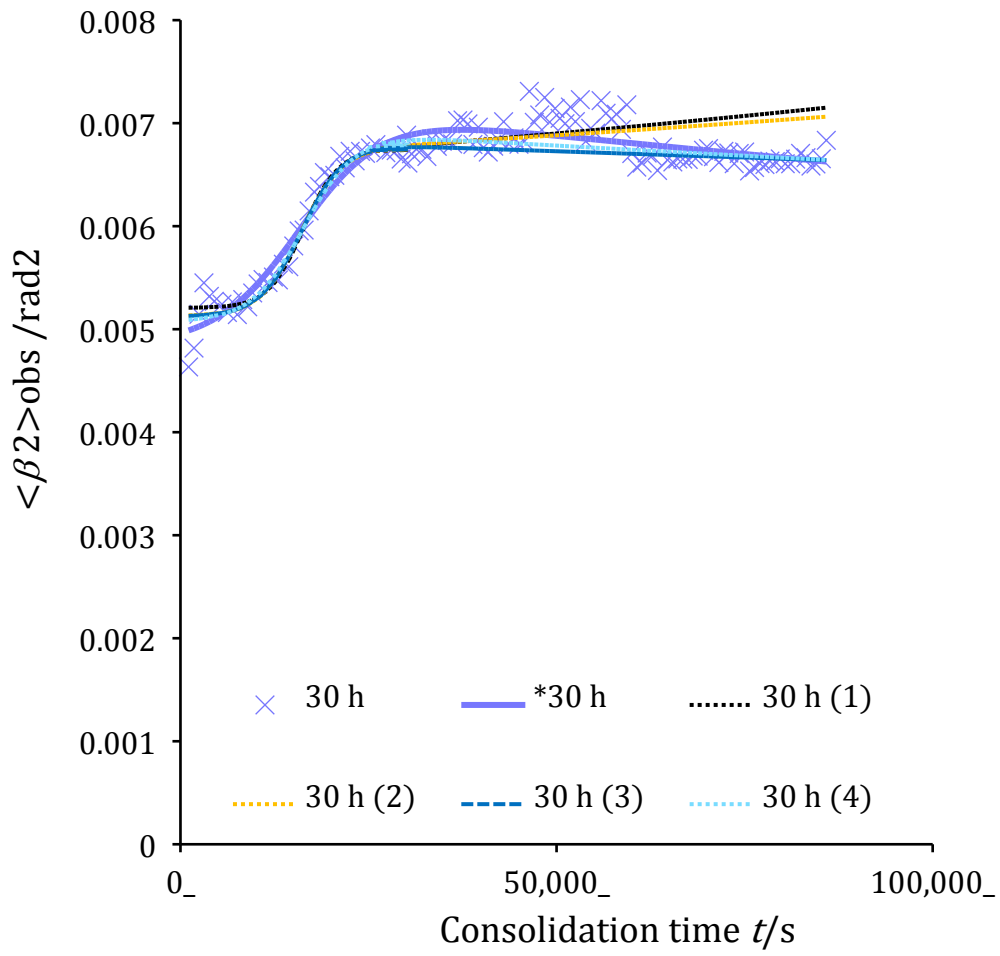

Fig. S3 Fitting results for a 30 h sample where all data points are used (\*30 h) and some scattered data points are omitted (30 h (1), 30 h (2)). Omitted points are not shown.
